# Supplementary material for: Activated FXR Inhibits Leptin Signaling and Counteracts Tumor-promoting Activities of Cancer-Associated Fibroblasts in Breast Malignancy
Source: PubMed Central journal article supplement (PMC4761870; doi:10.1038/srep21782), 2016-02-22
Supplement: srep21782-s1.pdf [file srep21782-s1.pdf]

# **Activated FXR Inhibits Leptin Signaling and Counteracts Tumor-promoting Activities of Cancer-Associated Fibroblasts in Breast Malignancy.**

Cinzia Giordano<sup>1,#</sup>, Ines Barone<sup>2,#</sup>, Valentina Vircillo<sup>2</sup>, Salvatore Panza<sup>2</sup>, Rocco Malivindi<sup>2</sup>, Luca Gelsomino<sup>2</sup>, Michele Pellegrino<sup>2</sup>, Vittoria Rago<sup>2</sup>, Loredana Mauro<sup>2</sup>, Marilena Lanzino<sup>2</sup>, Maria Luisa Panno<sup>2</sup>, Daniela Bonofiglio<sup>2</sup>, Stefania Catalano<sup>2,\*</sup>, Sebastiano Andò<sup>1,2,\*</sup>

## **Author Affiliations:**

<sup>1</sup>Centro Sanitario, <sup>2</sup>Department of Pharmacy, Health and Nutritional Sciences, University of Calabria, Arcavacata di Rende, CS, Italy;

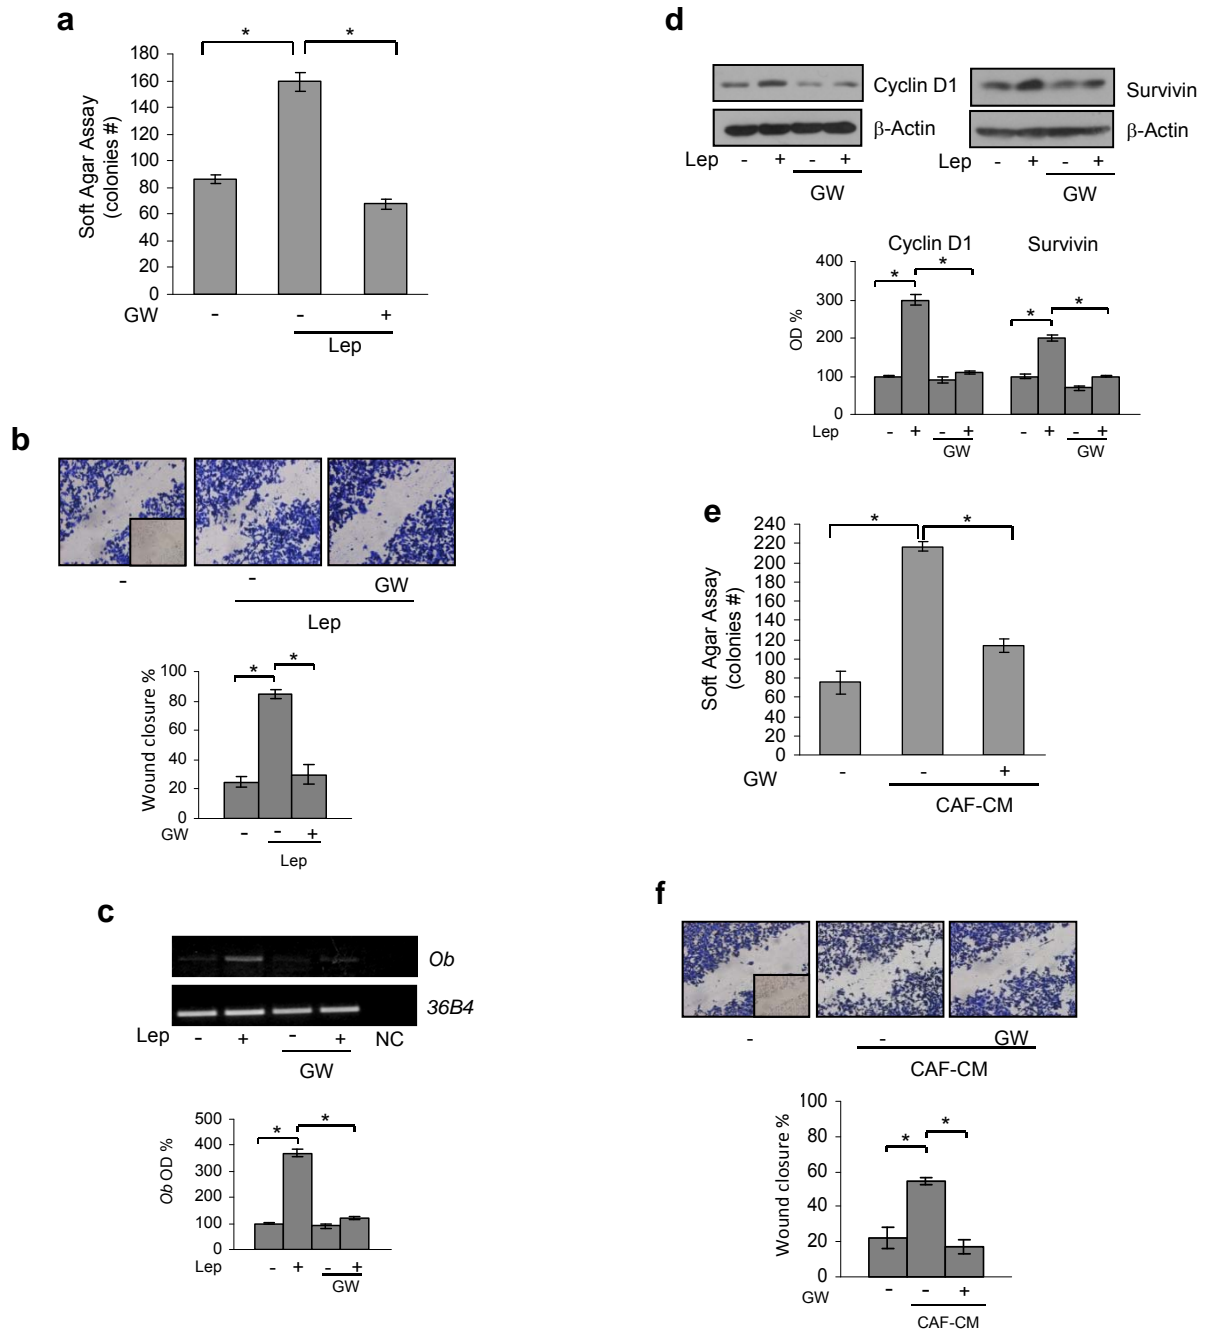

**Supplementary Figure S1. Effects of activated FXR in SKBR3 breast cancer cells. (a)** Soft Agar growth assay in SKBR3 cells treated with Leptin (Lep, 500ng/ml) with/without GW4064 (6 $\mu$ M). **(b)** Wound-healing assay in cells treated as indicated for 24h. *Upper panel*, representative images from each condition (inset, time 0). *Lower panel*, relative percentage of wound closure. **(c)** RT-PCR analysis of leptin (*Ob*) mRNA levels. *36B4*, internal standard. NC, negative control. **(d)** Immunoblot analysis for Survivin, Cyclin D1,  $\beta$ -Actin (loading control) expression. *Lower panels* for **(c)** and **(d)**, the histograms represent the mean  $\pm$  SD of three separate experiments in which band intensities were evaluated in terms of optical density arbitrary units (OD), expressed as percentage of vehicle-treated samples assumed to be 100%. **(e)** Soft Agar growth assay in cells treated with CAF-CM with/without GW4064. **(f)** Wound-healing assay in cells treated as indicated. *Upper panel*, representative images from each condition (inset, time 0). *Lower panel*, relative percentage of wound closure. The values represent the mean  $\pm$  SD of three independent experiments. \* $p < 0.05$ .

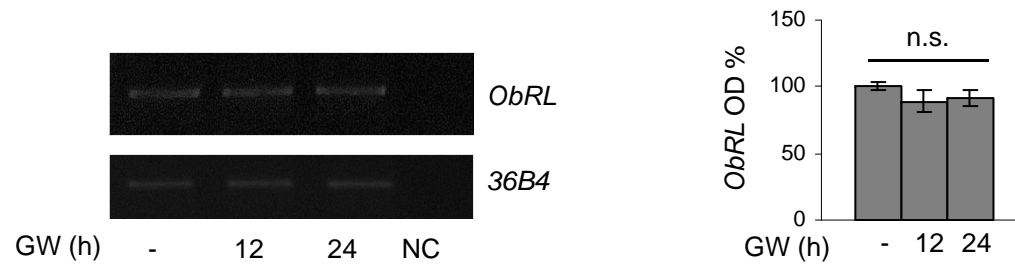

**Supplementary Figure S2. Effects of activated FXR on leptin receptor expression in MCF-7 breast cancer cells.** Leptin receptor long isoform (*ObRL*) mRNA expression in MCF-7 cells treated for 12 or 24 hours with GW4064 (GW, 6 $\mu$ M) by RT-PCR analysis. *36B4* (internal standard). NC, negative control. The histograms represent the mean  $\pm$ SD of three separate experiments in which band intensities were evaluated in terms of optical density arbitrary units (OD) and expressed as percentage of vehicle-treated samples which were assumed to be 100%; n.s: nonsignificant.

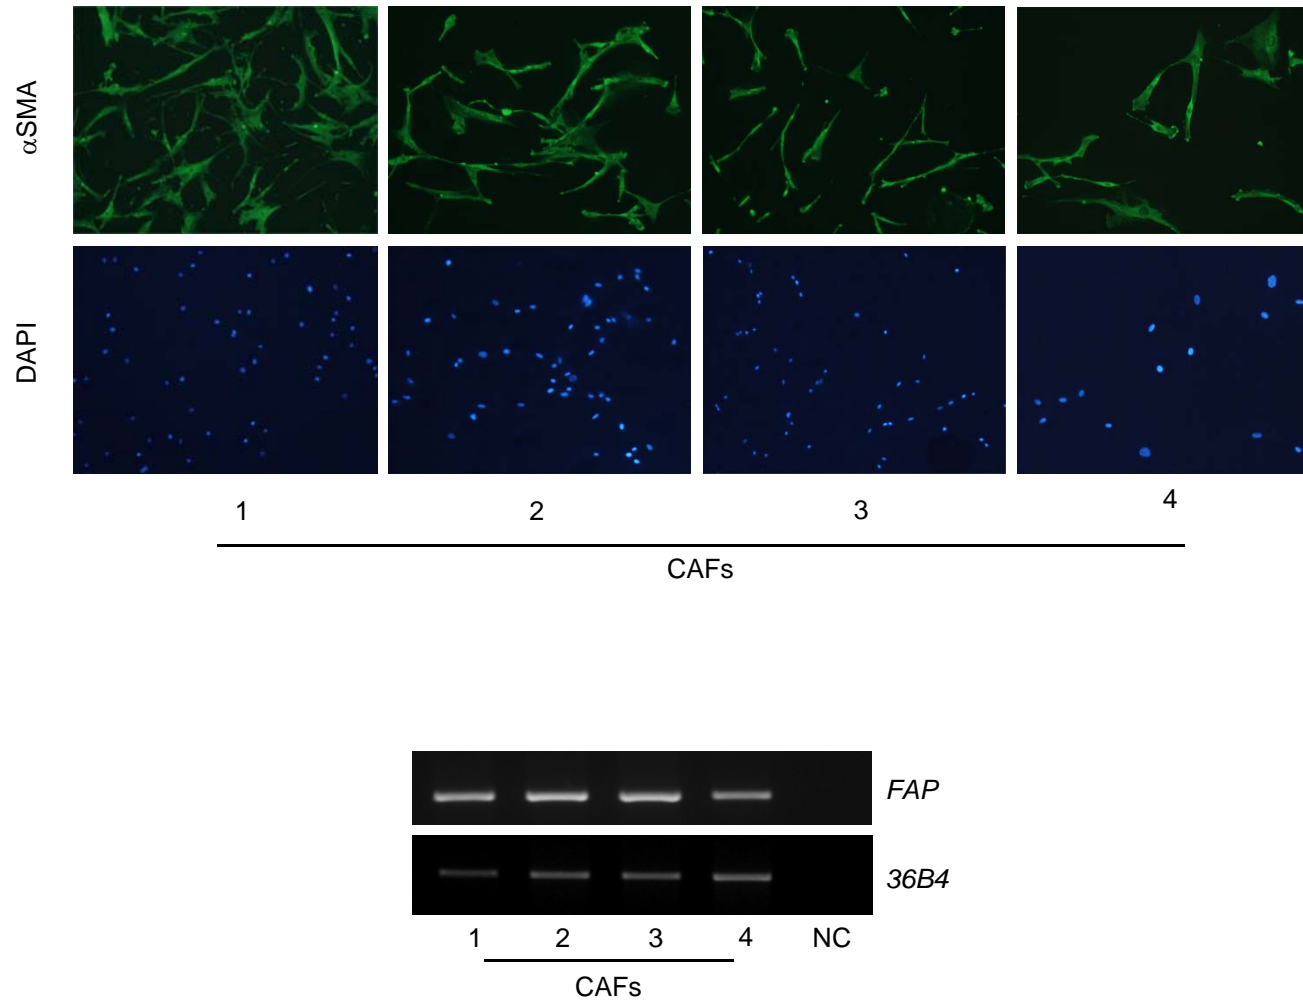

**Supplementary Figure S3. Characterization of Cancer-Associated Fibroblasts.** Cancer-Associated Fibroblasts (CAFs) were isolated from four primary breast tumour biopsies by collagenase digestion. *Upper panel*, immunofluorescence of alpha-smooth muscle actin ( $\alpha$ -SMA) and DAPI staining (for nuclei detection); *lower panel*, RT-PCR analysis of Fibroblast Activation Protein (*FAP*) mRNA levels. *36B4* (internal standard). NC, negative control.

**Supplementary Table S1.** Oligonucleotide primers used in this study.

| <b>Gene Symbol</b> | <b>Gene Name</b>                                        | <b>Primer Sequences</b>                                                  |
|--------------------|---------------------------------------------------------|--------------------------------------------------------------------------|
| <i>SOCS3</i>       | Suppressor of cytokine signaling 3                      | For 5'-ATCCTGGTGACATGCTCCTC- 3'<br>Rev 5' - GGCACCAGGTAGACTTTGGA-3'      |
| <i>Ob</i>          | Leptin                                                  | For 5' - CTGTGCCCATCCAAAAAGTCC-3'<br>Rev 5' - CCCCAGGCTGTCCAAGGTC-3'     |
| <i>ObRL</i>        | Leptin Receptor Long Isoform                            | For 5'-CGAGAAACGTTTCAGCATCT-3'<br>Rev 5' - CAAAAGCACACCACTCTCTC-3'       |
| <i>FAP</i>         | Fibroblast activation protein                           | For 5'-AGAAAGCAGAACTGGATGG-3'<br>Rev 5'-ACACACTTCTTGCTTGGAGGAT-3'        |
| <i>FXR</i>         | Nuclear receptor subfamily 1, group H, member 4 (NR1H4) | For 5'-CGAGCCTGAAGAGTGGTACTGTC-3'<br>Rev 5' - CATTGAGCCAACATTCCCATCTC-3' |
| <i>36B4</i>        | 36B4                                                    | For 5'-CTCAACATCTCCCCCTTCTC-3'<br>Rev 5' - CAAATCCCATATCCTCGT -3'        |
